# Supplementary material for: Exploration of N-Arylsulfonyl-indole-2-carboxamide Derivatives as Novel Fructose-1,6-bisphosphatase Inhibitors by Molecular Simulation
Source: MDPI journal article supplement (doi:10.3390/ijms231810259), 2022-09-06
Supplement: s1 [file s1]

## *Supplementary materials*

# **Exploration of *N*-arylsulfonyl-indole-2-carboxamide derivatives as novel fructose-1,6-bisphosphatase inhibitors by molecular simulation**

Yilan Zhao <sup>a</sup>, Honghao Yang <sup>a</sup>, Fengshou Wu <sup>a</sup>, Xiaogang Luo <sup>a, b, c</sup>,

Qi Sun <sup>a, c</sup>, Weiliang Feng <sup>a \*</sup>, Xiulian Ju <sup>a</sup>, Genyan Liu <sup>a, c \*</sup>

<sup>a</sup> *Hubei Key Laboratory of Novel Reactor and Green Chemical Technology, Key Laboratory for Green Chemical Process of Ministry of Education, School of Chemical Engineering and Pharmacy, Wuhan Institute of Technology, Wuhan 430205, P. R. China*

<sup>b</sup> *School of Materials Science and Engineering, Zhengzhou University, No. 100 Science Avenue, Zhengzhou City, 450001, Henan Province, P. R. China*

<sup>c</sup> *Key Laboratory of Novel Biomass-Based Environmental and Energy Materials in Petroleum and Chemical Industry, Wuhan Institute of Technology, Wuhan 430205, P. R. China*

\*Corresponding authors: Genyan Liu, Weiliang Feng

*E-mail addresses:* liugenyan@wit.edu.com (G. Liu); fengweiliangax@126.com

**Table S1.** Chemical structures and the experimental activity of the compounds as FBPIs.

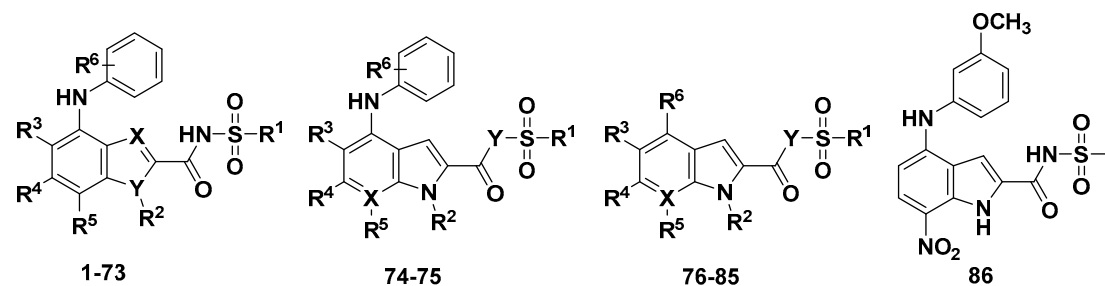

| No.             | X | Y | R <sup>1</sup>             | R <sup>2</sup> | R <sup>3</sup> | R <sup>4</sup> | R <sup>5</sup>  | R <sup>6</sup>       | pIC <sub>50</sub> | Predicted pIC <sub>50</sub> |
|-----------------|---|---|----------------------------|----------------|----------------|----------------|-----------------|----------------------|-------------------|-----------------------------|
| 1               | C | N | cPr                        | H              | H              | H              | NO <sub>2</sub> | 2-OMe                | 5.538             | 5.637                       |
| 2               | C | N | Ph                         | H              | H              | H              | NO <sub>2</sub> | 2-OMe                | 6.854             | 6.801                       |
| 3               | C | N | 3-methoxyphenyl            | H              | H              | H              | NO <sub>2</sub> | 2-OMe                | 6.824             | 6.861                       |
| 4 <sup>#</sup>  | C | N | 4- methoxyphenyl           | H              | H              | H              | NO <sub>2</sub> | 2-OMe                | 6.721             | 6.618                       |
| 5               | C | N | 2-fluorophenyl             | H              | H              | H              | NO <sub>2</sub> | 2-OMe                | 6.620             | 6.659                       |
| 6               | C | N | 3-fluorophenyl             | H              | H              | H              | NO <sub>2</sub> | 2-OMe                | 6.854             | 6.827                       |
| 7               | C | N | 4-fluorophenyl             | H              | H              | H              | NO <sub>2</sub> | 2-OMe                | 6.796             | 6.889                       |
| 8               | C | N | 3-nitrophenyl              | H              | H              | H              | NO <sub>2</sub> | 2-OMe                | 7.000             | 6.962                       |
| 9               | C | N | 4-nitrophenyl              | H              | H              | H              | NO <sub>2</sub> | 2-OMe                | 6.678             | 6.541                       |
| 10              | C | N | 4-(trifluoromethoxy)phenyl | H              | H              | H              | NO <sub>2</sub> | 2-OMe                | 6.659             | 6.642                       |
| 11              | C | N | thiophen-2-yl              | H              | H              | H              | NO <sub>2</sub> | 2-OMe                | 6.495             | 6.449                       |
| 12 <sup>#</sup> | C | N | naphthalen-2-yl            | H              | H              | H              | NO <sub>2</sub> | 2-OMe                | 6.553             | 6.300                       |
| 13              | C | N | Ph                         | H              | H              | H              | NO <sub>2</sub> | 2-OMe                | 5.509             | 5.577                       |
| 14              | C | N | Ph                         | H              | H              | H              | NO <sub>2</sub> | 4-OMe                | 6.000             | 5.963                       |
| 15 <sup>#</sup> | C | N | 3-methoxyphenyl            | H              | H              | H              | NO <sub>2</sub> | 3-OEt                | 6.921             | 6.882                       |
| 16 <sup>#</sup> | C | N | 3-methoxyphenyl            | H              | H              | H              | NO <sub>2</sub> | 3-OCF <sub>2</sub> H | 6.886             | 7.193                       |
| 17              | C | N | 3-methoxyphenyl            | H              | H              | H              | NO <sub>2</sub> | 3-Me                 | 6.824             | 6.649                       |
| 18              | C | N | 3-methoxyphenyl            | H              | H              | H              | NO <sub>2</sub> | 3-Et                 | 6.367             | 6.483                       |
| 19              | C | N | 3-methoxyphenyl            | H              | H              | H              | NO <sub>2</sub> | 3-acetamido          | 6.796             | 6.826                       |
| 20              | C | N | 3-methoxyphenyl            | H              | H              | H              | NO <sub>2</sub> | 3-F                  | 5.996             | 6.121                       |
| 21              | C | N | 3-methoxyphenyl            | H              | H              | H              | NO <sub>2</sub> | 4-F                  | 5.821             | 5.879                       |
| 22              | C | N | 3-methoxyphenyl            | H              | H              | H              | NO <sub>2</sub> | 3-CF <sub>3</sub>    | 6.180             | 6.131                       |
| 23              | C | N | 3-methoxyphenyl            | H              | H              | H              | NO <sub>2</sub> | 4-CF <sub>3</sub>    | 6.041             | 6.000                       |
| 24 <sup>#</sup> | C | N | 3-methoxyphenyl            | H              | H              | H              | NO <sub>2</sub> | 3-NO <sub>2</sub>    | 6.854             | 7.100                       |
| 25              | C | N | 3-methoxyphenyl            | H              | H              | H              | NO <sub>2</sub> | 4-NO <sub>2</sub>    | 6.456             | 6.449                       |
| 26              | C | N | 3-methoxyphenyl            | H              | H              | H              | NO <sub>2</sub> | 3-morpholino         | 6.509             | 6.557                       |
| 27 <sup>#</sup> | C | N | 3-methoxyphenyl            | H              | H              | H              | NO <sub>2</sub> | 4- morpholino        | 5.963             | 6.007                       |
| 28 <sup>#</sup> | C | N | 3-methoxyphenyl            | H              | H              | H              | NO <sub>2</sub> | 3,5-dimethoxy        | 6.854             | 6.857                       |
| 29              | C | N | 3-methoxyphenyl            | H              | H              | H              | NO <sub>2</sub> | 2,3- dimethoxy       | 5.836             | 5.794                       |
| 30              | C | N | 3-methoxyphenyl            | H              | H              | H              | NO <sub>2</sub> | 2,4- dimethoxy       | 5.893             | 5.962                       |

Table S1. (Continued)

|                 |   |   |                            |     |    |                 |                 |                   |       |       |
|-----------------|---|---|----------------------------|-----|----|-----------------|-----------------|-------------------|-------|-------|
| 31 <sup>#</sup> | C | N | 3-methoxyphenyl            | H   | H  | H               | NO <sub>2</sub> | 4-Cl-3-OMe        | 6.921 | 6.915 |
| 32              | C | N | 3-methoxyphenyl            | H   | H  | H               | NO <sub>2</sub> | 4-F-3-OMe         | 6.398 | 6.333 |
| 33              | C | N | 3-methoxyphenyl            | H   | H  | H               | NO <sub>2</sub> | 3,4,5-triomethoxy | 6.699 | 6.779 |
| 34              | C | N | 3-methoxyphenyl            | H   | F  | H               | NO <sub>2</sub> | 2-OMe             | 6.585 | 6.433 |
| 35              | C | N | 3-methoxyphenyl            | H   | Cl | H               | NO <sub>2</sub> | 2-OMe             | 6.022 | 6.151 |
| 36              | C | N | 3-methoxyphenyl            | H   | Me | H               | NO <sub>2</sub> | 2-OMe             | 6.022 | 5.896 |
| 37              | C | N | 3-methoxyphenyl            | H   | H  | H               | H               | 2-OMe             | 5.432 | 5.629 |
| 38 <sup>#</sup> | C | N | 3-methoxyphenyl            | H   | F  | H               | H               | 2-OMe             | 5.921 | 5.704 |
| 39              | C | N | 3-methoxyphenyl            | H   | Cl | H               | NO <sub>2</sub> | 2-OMe             | 5.959 | 5.647 |
| 40              | C | N | 3-methoxyphenyl            | H   | Me | H               | NO <sub>2</sub> | 2-OMe             | 5.444 | 5.512 |
| 41 <sup>#</sup> | C | N | 3-methoxyphenyl            | H   | H  | F               | NO <sub>2</sub> | 2-OMe             | 6.244 | 6.079 |
| 42 <sup>#</sup> | C | N | 3-methoxyphenyl            | H   | H  | Cl              | NO <sub>2</sub> | 2-OMe             | 6.796 | 7.102 |
| 43 <sup>#</sup> | C | N | 3-methoxyphenyl            | H   | H  | CN              | NO <sub>2</sub> | 2-OMe             | 6.444 | 6.538 |
| 44 <sup>#</sup> | C | N | 3-methoxyphenyl            | H   | H  | CF <sub>3</sub> | NO <sub>2</sub> | 2-OMe             | 6.292 | 6.137 |
| 45 <sup>#</sup> | C | N | 3-methoxyphenyl            | Me  | H  | H               | NO <sub>2</sub> | 3-OMe             | 7.398 | 7.181 |
| 46              | C | N | 3-methoxyphenyl            | Et  | H  | H               | NO <sub>2</sub> | 3-OMe             | 6.678 | 6.700 |
| 47              | C | N | 3-methoxyphenyl            | iBu | H  | H               | NO <sub>2</sub> | 3-OMe             | 6.398 | 6.341 |
| 48              | C | N | 3-methoxyphenyl            | Me  | H  | H               | NO <sub>2</sub> | 3-Me              | 7.046 | 7.179 |
| 49 <sup>#</sup> | C | N | 3-methoxyphenyl            | Me  | H  | H               | NO <sub>2</sub> | 3-EtO             | 6.638 | 6.951 |
| 50              | C | N | 3-methoxyphenyl            | Me  | H  | H               | NO <sub>2</sub> | 3-acetamido       | 7.229 | 7.136 |
| 51 <sup>#</sup> | C | N | 3-methoxyphenyl            | Me  | H  | H               | NO <sub>2</sub> | 3,5-dimethoxy     | 7.200 | 7.373 |
| 52 <sup>#</sup> | C | N | 3-methoxyphenyl            | Me  | H  | H               | NO <sub>2</sub> | 3,4,5-trimethoxy  | 5.886 | 5.818 |
| 53              | C | N | 3-methoxyphenyl            | Me  | H  | H               | NO <sub>2</sub> | 4-Cl-3-OMe        | 7.200 | 7.125 |
| 54              | C | N | 4-methoxyphenyl            | Me  | H  | H               | NO <sub>2</sub> | 2-OMe             | 7.284 | 7.309 |
| 55              | C | N | Ph                         | Me  | H  | H               | Cl              | 2-OMe             | 6.745 | 6.810 |
| 56              | C | N | 3-methoxyphenyl            | Me  | H  | H               | Cl              | 2-OMe             | 6.824 | 6.817 |
| 57              | C | N | 2-fluorophenyl             | Me  | H  | H               | Cl              | 2-OMe             | 6.854 | 6.879 |
| 58 <sup>#</sup> | C | N | 3-fluorophenyl             | Me  | H  | H               | Cl              | 2-OMe             | 6.638 | 6.800 |
| 59 <sup>#</sup> | C | N | 4- fluorophenyl            | Me  | H  | H               | Cl              | 2-OMe             | 6.328 | 6.272 |
| 60              | C | N | 3-bromophenyl              | Me  | H  | H               | Cl              | 2-OMe             | 6.854 | 6.898 |
| 61              | C | N | 4-tolyl                    | Me  | H  | H               | Cl              | 2-OMe             | 7.149 | 6.921 |
| 62              | C | N | cyanophenyl                | Me  | H  | H               | Cl              | 2-OMe             | 7.252 | 7.324 |
| 63              | C | N | 3-isobutylphenyl           | Me  | H  | H               | Cl              | 2-OMe             | 6.027 | 6.119 |
| 64              | C | N | pyridinyl                  | Me  | H  | H               | Cl              | 2-OMe             | 6.658 | 6.683 |
| 65 <sup>#</sup> | C | N | 2-(trifluoromethoxy)phenyl | Me  | H  | H               | Cl              | 2-OMe             | 6.114 | 6.062 |
| 66              | C | N | 3-(trifluoromethoxy)phenyl | Me  | H  | H               | Cl              | 2-OMe             | 7.071 | 7.037 |
| 67              | C | N | 4-(trifluoromethoxy)phenyl | Me  | H  | H               | Cl              | 2-OMe             | 7.155 | 7.047 |
| 68 <sup>#</sup> | C | N | 2-isobutylthiophene        | Me  | H  | H               | Cl              | 2-OMe             | 6.886 | 7.043 |
| 69              | C | N | 1-methylindoline           | Me  | H  | H               | Cl              | 2-OMe             | 6.229 | 6.325 |

**Table S1.** (Continued)

|    |   |    |                                                                                   |    |   |   |                 |                                                                                      |         |       |
|----|---|----|-----------------------------------------------------------------------------------|----|---|---|-----------------|--------------------------------------------------------------------------------------|---------|-------|
| 70 | C | NH | 3-methoxyphenyl                                                                   | -  | H | H | Cl              | 2-OMe                                                                                | 7.000   | 7.078 |
| 71 | N | N  | 3-methoxyphenyl                                                                   | Me | H | H | Cl              | 2-OMe                                                                                | 7.569   | 6.752 |
| 72 | C | N  | 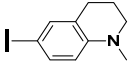 | Me | H | H | Cl              | 2-OMe                                                                                | 6.268   | 6.235 |
| 73 | C | N  |  | Me | H | H | Cl              | 2-OMe                                                                                | 6.174   | 6.146 |
| 74 | N | NH | 3-methoxyphenyl                                                                   | H  | H | H | -               | 2-OMe                                                                                | 6.149   | 6.369 |
| 75 | C | NH | 3-methoxyphenyl                                                                   | Me | H | H | Cl              | 2-OMe                                                                                | 7.538   | 7.594 |
| 76 | C | NH | 3-methoxyphenyl                                                                   | H  | H | H | NO <sub>2</sub> |    | 5.854   | 5.863 |
| 77 | C | NH | 3-methoxyphenyl                                                                   | H  | H | H | NO <sub>2</sub> |   | 6.155   | 6.136 |
| 78 | C | NH | 3-methoxyphenyl                                                                   | H  | H | H | NO <sub>2</sub> |  | 6.013   | 5.997 |
| 79 | C | NH | 3-methoxyphenyl                                                                   | H  | H | H | NO <sub>2</sub> |  | 6.060   | 6.070 |
| 80 | C | NH | 3-methoxyphenyl                                                                   | H  | H | H | NO <sub>2</sub> |  | 5.854   | 5.747 |
| 81 | C | NH | 3-methoxyphenyl                                                                   | H  | H | H | NO <sub>2</sub> |  | 5.770   | 5.754 |
| 82 | C | NH | 3-methoxyphenyl                                                                   | H  | H | H | NO <sub>2</sub> |  | 5.745   | 5.721 |
| 83 | C | NH | 3-methoxyphenyl                                                                   | H  | H | H | NO <sub>2</sub> |  | 5.699   | 5.575 |
| 84 | C | NH | 3-methoxyphenyl                                                                   | H  | H | H | NO <sub>2</sub> |  | 4.449   | 4.408 |
| 85 | C | NH | Ph                                                                                | H  | H | H | NO <sub>2</sub> | Cl                                                                                   | 4.614   | 4.711 |
| 86 | - | -  | -                                                                                 | -  | - | - | -               | -                                                                                    | < 4.304 | -     |

<sup>#</sup> The test set molecules used to validate the 3D-QSAR models.

**Table S2.** Chemical structures and docking scores of the twelve screened compounds.

| Hit compound        | Structure                                                                            | Total score |
|---------------------|--------------------------------------------------------------------------------------|-------------|
| ZINC32837457        | 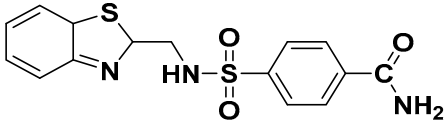   | 7.96        |
| ZINC15733809 (VS01) |    | 7.85        |
| ZINC02961023 (VS02) |    | 6.98        |
| ZINC08670831        |    | 6.15        |
| ZINC02961075 (VS03) |   | 6.12        |
| ZINC47146484        |  | 6.00        |
| ZINC48903386        |  | 5.95        |
| ZINC47147329        |  | 5.70        |

**Table S2.** (Continued)

|              |                                                                                      |      |
|--------------|--------------------------------------------------------------------------------------|------|
| ZINC47147354 | 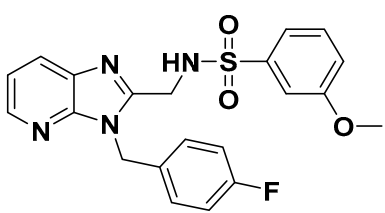   | 5.24 |
| ZINC58356765 |    | 5.19 |
| ZINC47146462 |    | 5.16 |
| ZINC08600440 |  | 5.09 |

**Table S3.** Predicted ADME parameters and drug-like properties of compound **75** and the screened compounds.

| Properties                       | Parameters                          | 75              | VS01   | VS02   | VS03   |
|----------------------------------|-------------------------------------|-----------------|--------|--------|--------|
| <b>Physiochemical Properties</b> | MW <sup>a</sup> (g/mol)             | 499.97          | 422.50 | 359.44 | 373.47 |
|                                  | Rotatable bonds                     | 8               | 4      | 8      | 8      |
|                                  | H-bond acceptors                    | 5               | 5      | 5      | 6      |
|                                  | H-bond donors                       | 2               | 3      | 1      | 1      |
|                                  | TPSA <sup>b</sup> (Å <sup>2</sup> ) | 107.04          | 116.09 | 81.08  | 81.08  |
| <b>Lipophilicity</b>             | iLOGP                               | 3.44            | 1.73   | 3.20   | 3.28   |
|                                  | XLOGP3                              | 4.85            | 2.97   | 3.48   | 3.84   |
|                                  | WLOGP                               | 5.79            | 4.59   | 3.92   | 4.23   |
|                                  | MOLGP                               | 2.35            | 1.51   | 1.35   | 1.58   |
|                                  | SILICOS-IT                          | 3.02            | 4.50   | 1.98   | 2.51   |
| <b>Water Solubility</b>          | Consensus LogP                      | 3.89            | 3.06   | 2.79   | 3.09   |
|                                  | ESOL Class                          | MS <sup>c</sup> | MS     | MS     | MS     |
|                                  | Ali Class                           | PS              | MS     | MS     | MS     |
|                                  | SILICOS-IT Class                    | PS <sup>d</sup> | PS     | PS     | PS     |
|                                  | GI <sup>e</sup> absorption          | Low             | High   | High   | High   |
| <b>Pharmacokinetics</b>          | BBB <sup>f</sup> permeant           | No              | No     | No     | No     |
|                                  | Lipinski violations                 | 0               | 0      | 0      | 0      |
|                                  | Ghose violations                    | 3               | 0      | 0      | 0      |
|                                  | Verber violations                   | 0               | 0      | 0      | 0      |
|                                  | Egan violations                     | 0               | 0      | 0      | 0      |
| <b>Drug-like Properties</b>      | Muegge violations                   | 0               | 0      | 0      | 0      |
|                                  | Bioavailability Score               | 0.55            | 0.55   | 0.55   | 0.55   |
|                                  | PAINS <sup>g</sup> alerts           | 0               | 0      | 0      | 0      |
|                                  | Brenk alerts                        | 0               | 0      | 0      | 0      |
|                                  | Leadlikeness violations             | 3               | 1      | 2      | 3      |
| <b>Medicinal Chemistry</b>       | Synthetic accessibility             | 3.43            | 3.24   | 2.91   | 3.03   |

<sup>a</sup> Molecular weight. <sup>b</sup> Total polar surface area. <sup>c</sup> Moderately soluble. <sup>d</sup> Poorly soluble. <sup>e</sup> Gastrointestinal.

<sup>f</sup> Blood-brain barrier. <sup>g</sup> Pan assay interference compounds.

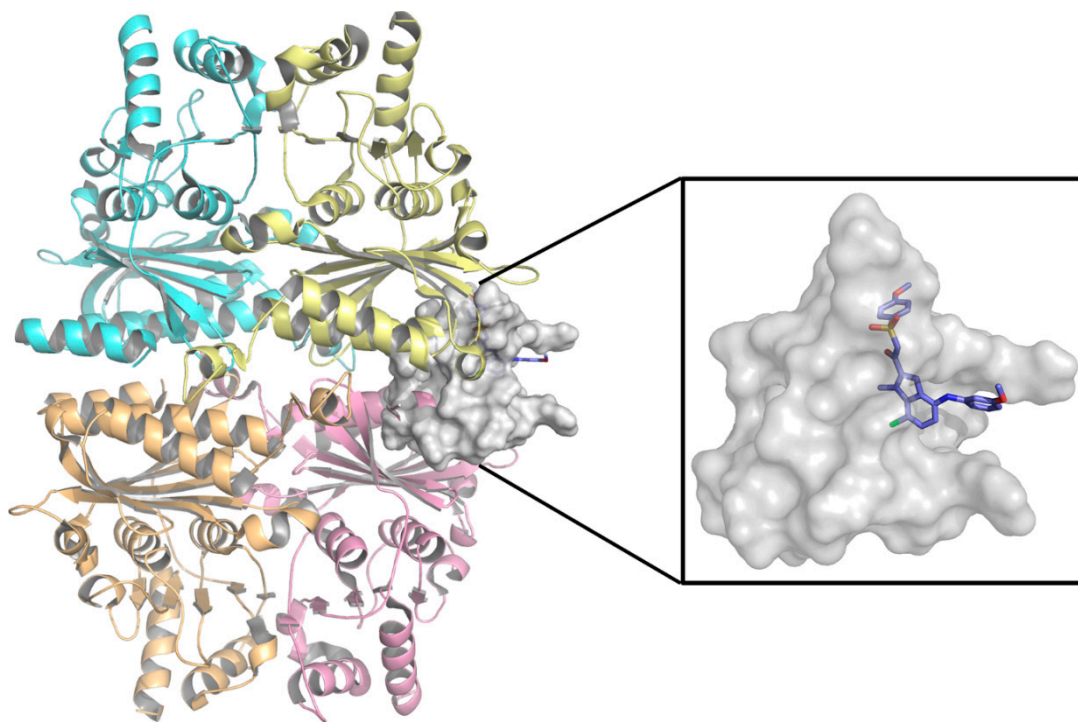

**Figure S1.** The 3D structure of FBPase in complex with compound **75** (PDB code: 6LW2). The AMP binding site is shown as a grey surface.



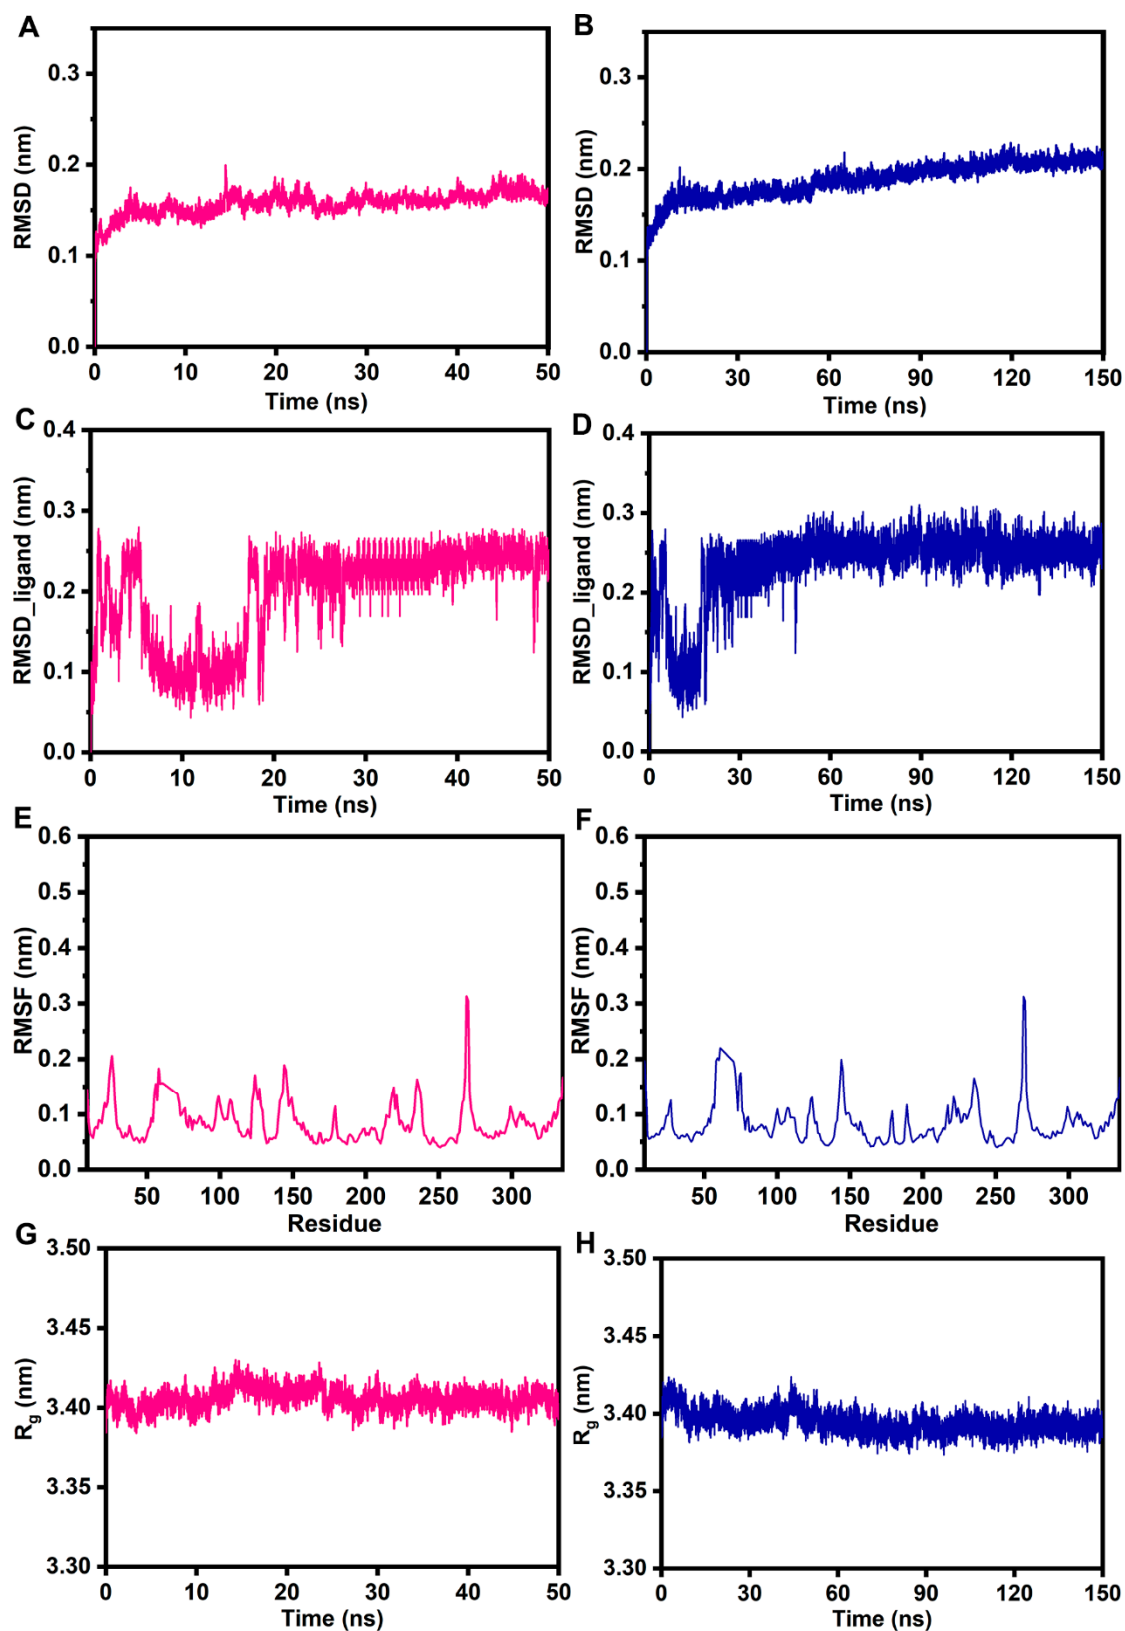

**Figure S2.** The MD results of the 50 ns (A, C, E, G) and 100 ns (B, D, F, H) simulations of FBPase-75 complex: RMSD values of backbone atoms (A, B), RMSD values of ligand atoms (C, D), RMSF values of Chain A residues (E, F), and  $R_g$  values of the proteins (G, H).

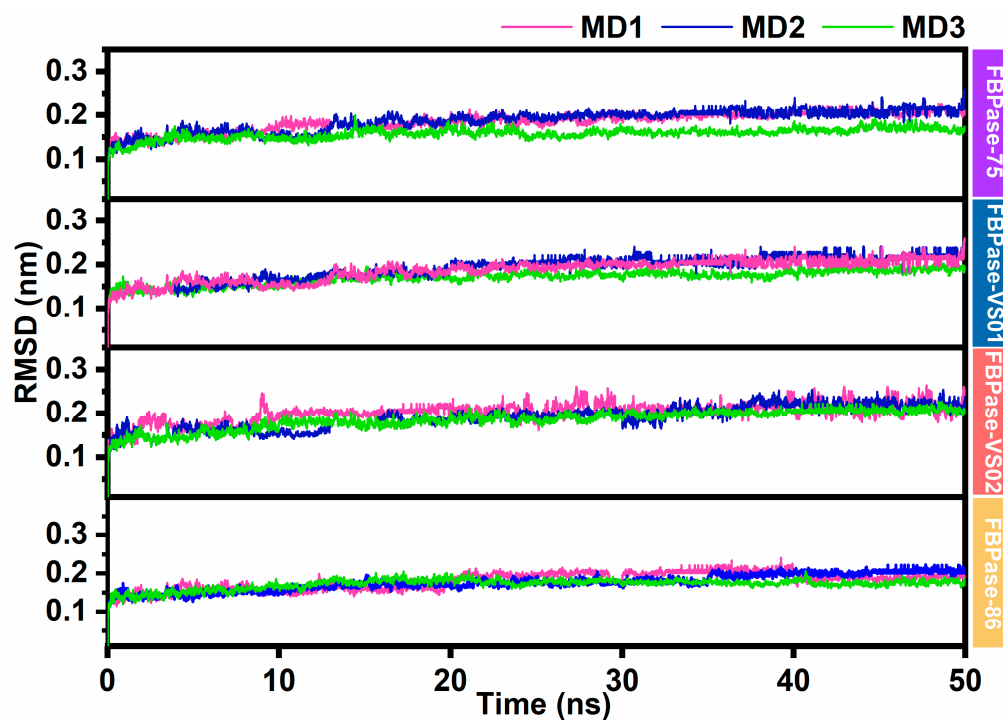

**Figure S3.** The RMSD plots of the protein backbones for the four complexes: FBPase-75, FBPase-86, FBPase-VS01, and FBPase-VS02 derived from the triplicate MD simulations (MD1-MD3).

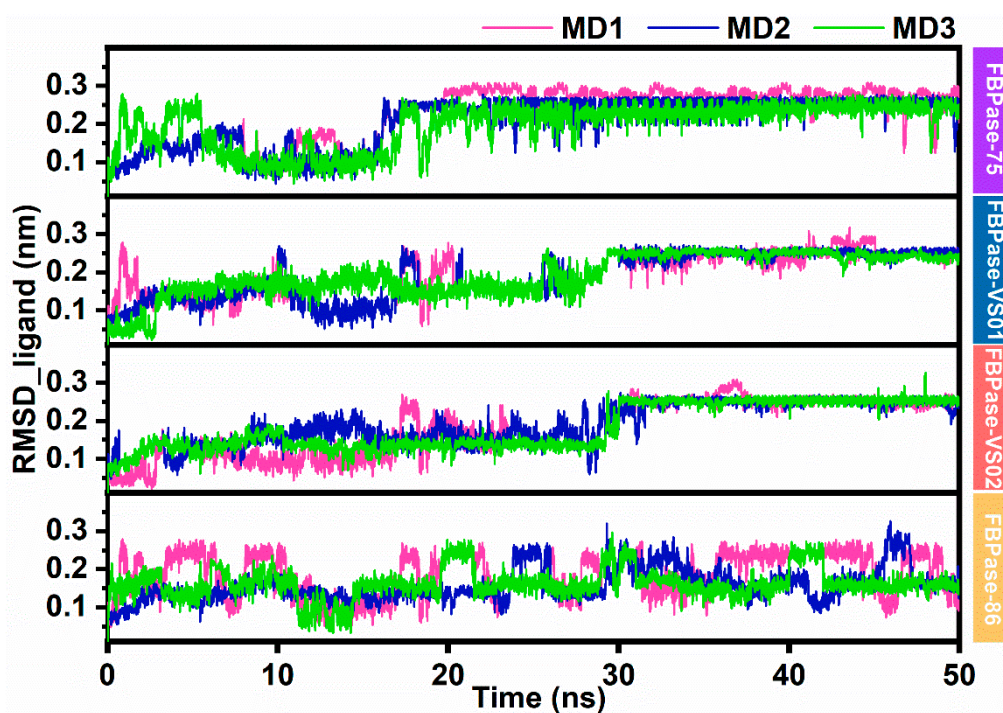

**Figure S4.** The RMSD plots of the ligands for the four complexes: FBPase-75, FBPase-86, FBPase-VS01, and FBPase-VS02 derived from the triplicate MD simulations (MD1-MD3).

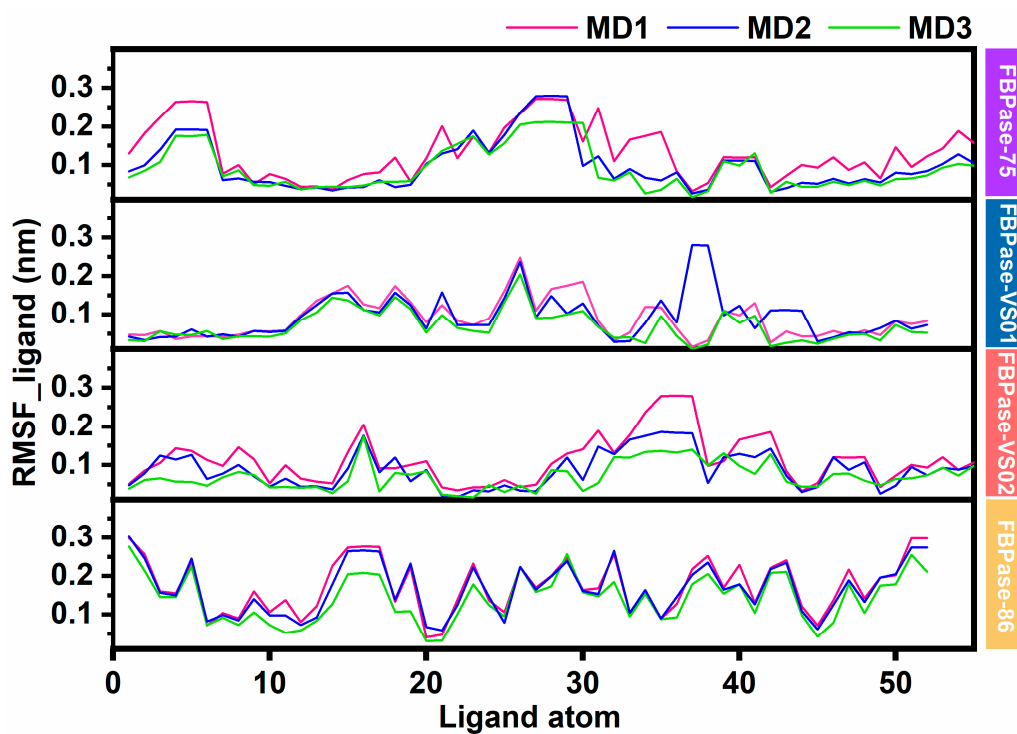

**Figure S5.** The RMSF plots of the ligands for the four complexes: FBPase-75, FBPase-86, FBPase-VS01, and FBPase-VS02 derived from the triplicate MD simulations (MD1-MD3).

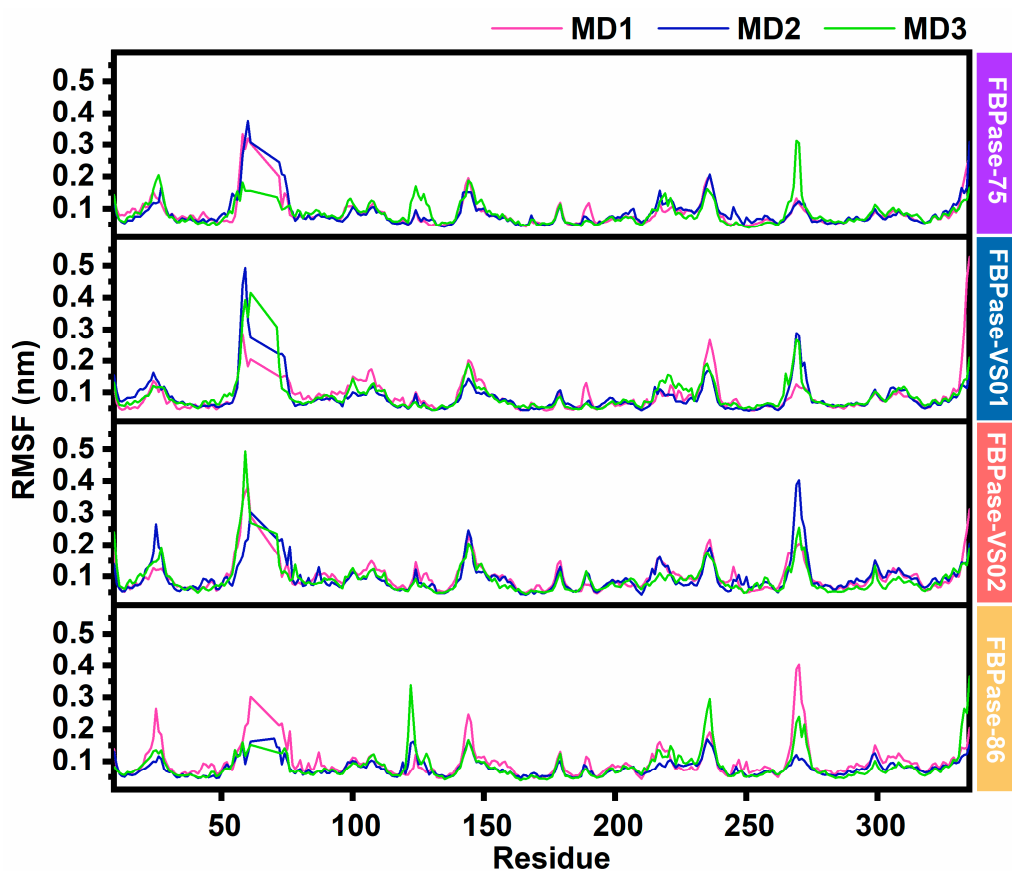

**Figure S6.** The RMSF plots of the Chain A residues for the four complexes: FBPase-75, FBPase-86, FBPase-VS01, and FBPase-VS02 derived from the triplicate MD simulations (MD1-MD3).

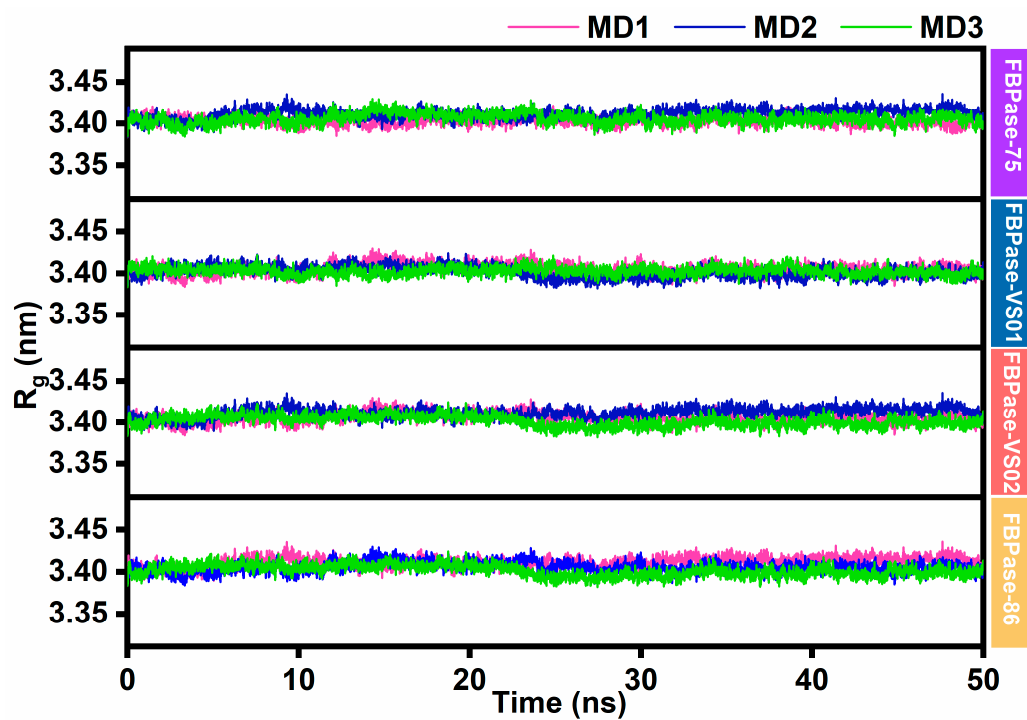

**Figure S7.** The  $R_g$  plots of the proteins for the four complexes: FBPase-75, FBPase-86, FBPase-VS01, and FBPase-VS02 derived from the triplicate MD simulations (MD1-MD3).
